# Supplementary material for: Comprehensive computational analysis of Hmd enzymes and paralogs in methanogenic Archaea
Source: PubMed Central journal article supplement (PMC2739858; doi:10.1186/1471-2148-9-199), 2009-08-11
Supplement: 1471-2148-9-199-S1.pdf [file 1471-2148-9-199-S1.pdf]

| <b>PROTEIN</b> | <b>E MJ(2661)</b> | <b>E Mtl</b> | <b>E Ma(N-3)</b> | <b>E Mm(C5)</b> | <b>E Mm(S2)</b> | <b>E Mv(SB)</b> | <b>E Mm(C6)</b> | <b>E Mvo(A3)</b> | <b>E Mm(C7)</b> | <b>E Mvo(PS)</b> |
|----------------|-------------------|--------------|------------------|-----------------|-----------------|-----------------|-----------------|------------------|-----------------|------------------|
| Geninfo ID     | 15668966          | 2833439      | 150401449        | 134046577       | 45357690        | 150399877       | 159905212       | 163799431        | 150403049       | 2833442          |
| total #aa      | 299               | 299          | 299              | 299             | 299             | 299             | 299             | 299              | 299             | 299              |
| N-term Domain  | 1 - 254           | 1 - 254      | 1 - 254          | 1 - 254         | 1 - 254         | 1 - 254         | 1 - 254         | 1 - 254          | 1 - 254         | 1 - 254          |
| C-term Domain  | 255 - 299         | 255 - 299    | 255 - 299        | 255 - 299       | 255 - 299       | 255 - 299       | 255 - 299       | 255 - 299        | 255 - 299       | 255 - 299        |

#### SEQUENCE SIMILARITIES

|                    |      |      |      |      |      |      |      |      |      |      |
|--------------------|------|------|------|------|------|------|------|------|------|------|
| <b>E MJ(2661)</b>  | 100  | 88.8 | 88.7 | 85.7 | 85.7 | 85.9 | 85.7 | 88.7 | 85   | 87   |
| <b>E Mtl</b>       | 88.8 | 100  | 93.4 | 90.9 | 90.8 | 91.1 | 90.8 | 91.1 | 90.1 | 91.5 |
| <b>E Ma(N-3)</b>   | 88.7 | 93.4 | 100  | 90.4 | 90.1 | 90.9 | 90.1 | 90.8 | 89.5 | 90.5 |
| <b>E Mm(C5)</b>    | 85.7 | 90.9 | 90.4 | 100  | 97.3 | 95.8 | 98.2 | 92.7 | 96.6 | 91.8 |
| <b>E Mm(S2)</b>    | 85.7 | 90.8 | 90.1 | 97.3 | 100  | 97   | 98.3 | 93.1 | 97.6 | 92.4 |
| <b>E Mv(SB)</b>    | 85.9 | 91.1 | 90.9 | 95.8 | 97   | 100  | 96.8 | 92.4 | 96   | 91.4 |
| <b>E Mm(C6)</b>    | 85.7 | 90.8 | 90.1 | 98.2 | 98.3 | 96.8 | 100  | 93.3 | 98.2 | 92.1 |
| <b>E Mvo (A3)</b>  | 88.7 | 91.1 | 90.8 | 92.7 | 93.1 | 92.4 | 93.3 | 100  | 91.1 | 95.6 |
| <b>E Mm(C7)</b>    | 85   | 90.1 | 89.5 | 96.6 | 97.6 | 96   | 98.2 | 91.1 | 100  | 91.3 |
| <b>E Mvo(PS)</b>   | 87   | 91.5 | 90.5 | 91.8 | 92.4 | 91.4 | 92.1 | 95.6 | 91.3 | 100  |
| <b>E Mth(w)</b>    | 82.1 | 80.1 | 79.1 | 80.1 | 79.8 | 80.2 | 80.1 | 80.6 | 79.7 | 80.9 |
| <b>E Mth(dH)</b>   | 82.6 | 80.8 | 79.8 | 79.7 | 79.7 | 79.7 | 79.7 | 80.6 | 79.3 | 81.1 |
| <b>E Mtm</b>       | 82.7 | 80.8 | 79.1 | 79.5 | 79.7 | 79.9 | 79.5 | 80.3 | 79.1 | 80.8 |
| <b>E Ml(Z)</b>     | 81.6 | 80.8 | 79.1 | 78.4 | 78.8 | 78.4 | 78.5 | 79.1 | 78.7 | 80.1 |
| <b>E Ms(ATCC)</b>  | 82.3 | 80.4 | 80.7 | 81.3 | 81.3 | 81.5 | 81.5 | 82   | 81.5 | 81.9 |
| <b>E Mk(AV19)</b>  | 79.5 | 78.6 | 78.1 | 76.6 | 76.6 | 76.1 | 76.7 | 77.1 | 76.4 | 78.1 |
| <b>P2 Mj(2661)</b> | 60.5 | 60.1 | 60.1 | 60.7 | 60.8 | 59   | 60.7 | 61.1 | 58.9 | 59.6 |
| <b>P Ma(N-3)</b>   | 59.6 | 59.6 | 59.4 | 58.6 | 58.5 | 58.9 | 58.6 | 58.7 | 58.9 | 58.9 |
| <b>P Mv(SB)</b>    | 60.1 | 60.9 | 59.2 | 59.1 | 58.9 | 59.7 | 58.9 | 59.5 | 59.7 | 59.1 |
| <b>P1 Mj(2661)</b> | 60.2 | 60.2 | 59.5 | 59.3 | 59.3 | 59.8 | 59.5 | 59.2 | 59.5 | 59.6 |
| <b>P1 Mth(dH)</b>  | 59.1 | 58.9 | 59.1 | 58.5 | 58.8 | 59.4 | 58.8 | 58.7 | 58.9 | 59.5 |
| <b>P2 Mth(dH)</b>  | 59.7 | 61.8 | 60.1 | 59.2 | 59.3 | 60   | 59.4 | 61.1 | 59.3 | 61.8 |
| <b>P1 Mtm</b>      | 59.7 | 60   | 60.1 | 58.9 | 58.9 | 59.4 | 59   | 58.7 | 59   | 60.8 |
| <b>P2 Mtm</b>      | 59.6 | 61.6 | 60.8 | 59   | 59.2 | 59.6 | 59.3 | 60.6 | 59.2 | 61.4 |
| <b>P Mm(C7)</b>    | 60.1 | 60.1 | 59.5 | 58.9 | 58.8 | 58.8 | 58.9 | 58.9 | 58.9 | 58.9 |
| <b>P Mm(C6)</b>    | 60.1 | 60.1 | 59.5 | 58.8 | 58.7 | 58.8 | 58.9 | 58.9 | 58.9 | 58.9 |
| <b>P Mm(S2)</b>    | 60.1 | 60.7 | 59.2 | 58.8 | 58.7 | 59.2 | 58.8 | 58.7 | 58.8 | 58.7 |
| <b>P Mm(C5)</b>    | 59.8 | 59.8 | 59.2 | 58.7 | 58.5 | 58.5 | 58.8 | 58.7 | 58.8 | 58.7 |
| <b>P1 Mk(AV19)</b> | 57.4 | 58.6 | 58   | 56.6 | 56.9 | 57.5 | 56.6 | 58   | 56.6 | 58   |
| <b>P2 Mk(AV19)</b> | 59.3 | 58.5 | 58.6 | 58.2 | 58.3 | 58.8 | 58.5 | 58.6 | 58.8 | 58.8 |
| <b>Pd Ma(N-3)</b>  | 52.8 | 54.5 | 55.3 | 53.8 | 52.1 | 53.2 | 52.1 | 54.8 | 52.1 | 55.2 |
| <b>Pd Mj(2661)</b> | 53.6 | 54.5 | 53.8 | 55.1 | 52.1 | 53.1 | 53.7 | 54.1 | 54.7 | 54.5 |
| <b>Pd Mm(C7)</b>   | 55.7 | 53.5 | 56.1 | 53.1 | 53.5 | 53.4 | 53.4 | 54.8 | 53.4 | 56.6 |

| <b>PROTEIN</b> | <b>E Mth(dH)</b> | <b>E Mtm</b> | <b>E MI(Z)</b> | <b>E Ms(ATCC)</b> | <b>E Mk(AV19)</b> | <b>P2 Mj(2661)</b> | <b>P Ma(N-3)</b> | <b>P Mv(SB)</b> | <b>P1 Mj(2661)</b> |
|----------------|------------------|--------------|----------------|-------------------|-------------------|--------------------|------------------|-----------------|--------------------|
| Geninfo ID     | 15679153         | 2828203      | 124486556      | 148642632         | 20093453          | 15668897           | 150401123        | 150399766       | 15669529           |
| total #aa      | 304              | 301          | 298            | 295               | 310               | 250                | 250              | 250             | 261                |
| N-term Domain  | 1 - 259          | 1 - 256      | 1 - 253        | 1 - 250           | 1 - 265           | 1 - 205            | 1 - 205          | 1 - 205         | 1 - 216            |
| C-term Domain  | 260 - 304        | 257 - 301    | 254 - 298      | 251 - 295         | 266 - 310         | 206 - 250          | 206 - 250        | 206 - 250       | 217 - 261          |

#### SEQUENCE SIMILARITIES

|                    |      |      |      |      |      |      |      |      |      |
|--------------------|------|------|------|------|------|------|------|------|------|
| <b>E MJ(2661)</b>  | 82.6 | 82.7 | 81.6 | 82.3 | 79.5 | 60.5 | 59.6 | 60.1 | 60.2 |
| <b>E MI</b>        | 80.8 | 80.8 | 80.8 | 80.4 | 78.6 | 60.1 | 59.6 | 60.9 | 60.2 |
| <b>E Ma(N-3)</b>   | 79.8 | 79.1 | 79.1 | 80.7 | 78.1 | 60.1 | 59.4 | 59.2 | 59.5 |
| <b>E Mm(C5)</b>    | 79.7 | 79.5 | 78.4 | 81.3 | 76.6 | 60.7 | 58.6 | 59.1 | 59.3 |
| <b>E Mm(S2)</b>    | 79.7 | 79.7 | 78.8 | 81.3 | 76.6 | 60.8 | 58.5 | 58.9 | 59.3 |
| <b>E Mv(SB)</b>    | 79.7 | 79.9 | 78.4 | 81.5 | 76.1 | 59   | 58.9 | 59.7 | 59.8 |
| <b>E Mm(C6)</b>    | 79.7 | 79.5 | 78.5 | 81.5 | 76.7 | 60.7 | 58.6 | 58.9 | 59.5 |
| <b>E Mvo (A3)</b>  | 80.6 | 80.3 | 79.1 | 82   | 77.1 | 61.1 | 58.7 | 59.5 | 59.2 |
| <b>E Mm(C7)</b>    | 79.3 | 79.1 | 78.7 | 81.5 | 76.4 | 58.9 | 58.9 | 59.7 | 59.5 |
| <b>E Mvo(PS)</b>   | 81.1 | 80.8 | 80.1 | 81.9 | 78.1 | 59.6 | 58.9 | 59.1 | 59.6 |
| <b>E Mth(w)</b>    | 98.5 | 97.7 | 87.7 | 85.8 | 78.1 | 59.5 | 59   | 59.1 | 58.9 |
| <b>E Mth(dH)</b>   | 100  | 98.4 | 87.4 | 85.8 | 77.5 | 59.8 | 59   | 59.5 | 59.2 |
| <b>E Mtm</b>       | 98.4 | 100  | 86.1 | 85.3 | 77.8 | 59.9 | 58.6 | 59.2 | 59   |
| <b>E MI(Z)</b>     | 87.4 | 86.1 | 100  | 83.1 | 76.2 | 61.1 | 58.3 | 59.5 | 60.1 |
| <b>E Ms(ATCC)</b>  | 85.8 | 85.3 | 83.1 | 100  | 79.8 | 59.2 | 58.8 | 58.8 | 59.3 |
| <b>E Mk(AV19)</b>  | 77.5 | 77.8 | 76.2 | 79.8 | 100  | 60.7 | 59.8 | 59.7 | 58.6 |
| <b>P2 Mj(2661)</b> | 59.8 | 59.9 | 61.1 | 59.2 | 60.7 | 100  | 78.6 | 77.8 | 82.1 |
| <b>P Ma(N-3)</b>   | 59   | 58.6 | 58.3 | 58.8 | 59.8 | 78.6 | 100  | 87.4 | 85.9 |
| <b>P Mv(SB)</b>    | 59.5 | 59.2 | 59.5 | 58.8 | 59.7 | 77.8 | 87.4 | 100  | 85.5 |
| <b>P1 Mj(2661)</b> | 59.2 | 59   | 60.1 | 59.3 | 58.6 | 82.1 | 85.9 | 85.5 | 100  |
| <b>P1 Mth(dH)</b>  | 59.9 | 58.3 | 59.6 | 58.9 | 59.5 | 76   | 81.3 | 81.2 | 81.6 |
| <b>P2 Mth(dH)</b>  | 59.2 | 59   | 61.1 | 59.3 | 59.2 | 78.6 | 83.1 | 83.4 | 84.6 |
| <b>P1 Mtm</b>      | 60.3 | 59   | 58.5 | 59.5 | 60.3 | 76.2 | 80.3 | 81.2 | 81.5 |
| <b>P2 Mtm</b>      | 59.2 | 59.2 | 60.1 | 59.2 | 59.6 | 77.1 | 82.2 | 82.7 | 83.7 |
| <b>P Mm(C7)</b>    | 59.7 | 59.5 | 59.2 | 59.1 | 61.3 | 77.4 | 87.1 | 92.1 | 86.2 |
| <b>P Mm(C6)</b>    | 59.7 | 59.5 | 58.9 | 58.8 | 60.1 | 76.9 | 88.1 | 93.1 | 86.1 |
| <b>P Mm(S2)</b>    | 60.1 | 59.1 | 59.7 | 58.9 | 60.9 | 77.1 | 87.7 | 93.1 | 85.6 |
| <b>P Mm(C5)</b>    | 59.7 | 59.5 | 58.9 | 58.6 | 61.1 | 76.8 | 87.7 | 92.5 | 85.5 |
| <b>P1 Mk(AV19)</b> | 60.7 | 60.8 | 58.6 | 58.5 | 58.1 | 66.2 | 66.8 | 65.6 | 68.1 |
| <b>P2 Mk(AV19)</b> | 59.4 | 59.3 | 59.3 | 57.9 | 60.2 | 65.6 | 66.8 | 64.1 | 67.7 |
| <b>Pd Ma(N-3)</b>  | 53   | 53.1 | 54.2 | 53.9 | 52.4 | 57.1 | 58.7 | 58.5 | 57.6 |
| <b>Pd Mj(2661)</b> | 53.6 | 53.3 | 53.9 | 53.9 | 53.6 | 55.3 | 56.1 | 56.3 | 55.9 |
| <b>Pd Mm(C7)</b>   | 51.6 | 53.1 | 55.1 | 53.3 | 56   | 56.7 | 56.9 | 55.1 | 57.5 |

| <b>PROTEIN</b> | <b>P1 Mth(dH)</b> | <b>P2 Mth(dH)</b> | <b>P1 Mtm</b> | <b>P2 Mtm</b> | <b>P Mm(C7)</b> | <b>P Mm(C6)</b> | <b>P Mm(S2)</b> | <b>P Mm(C5)</b> | <b>P1 Mk(AV19)</b> |
|----------------|-------------------|-------------------|---------------|---------------|-----------------|-----------------|-----------------|-----------------|--------------------|
| Geninfo ID     | 15678532          | 15679509          | 7573569       | 7573567       | 150402915       | 159905340       | 45359279        | 134046716       | 20094558           |
| total #aa      | 256               | 253               | 253           | 253           | 250             | 250             | 250             | 250             | 228                |
| N-term Domain  | 1 - 211           | 1 - 208           | 1 - 208       | 1 - 208       | 1 - 205         | 1 - 205         | 1 - 205         | 1 - 205         | 1 - 184            |
| C-term Domain  | 212 - 256         | 209 - 253         | 209 - 253     | 209 - 253     | 206 - 250       | 206 - 250       | 206 - 250       | 206 - 250       | 185 - 228          |

#### SEQUENCE SIMILARITIES

|                    |      |      |      |      |      |      |      |      |      |
|--------------------|------|------|------|------|------|------|------|------|------|
| <b>E MJ(2661)</b>  | 59.1 | 59.7 | 59.7 | 59.6 | 60.1 | 60.1 | 60.1 | 59.8 | 57.4 |
| <b>E Mtl</b>       | 58.9 | 61.8 | 60   | 61.6 | 60.1 | 60.1 | 60.7 | 59.8 | 58.6 |
| <b>E Ma(N-3)</b>   | 59.1 | 60.1 | 60.1 | 60.8 | 59.5 | 59.5 | 59.2 | 59.2 | 58   |
| <b>E Mm(C5)</b>    | 58.5 | 59.2 | 58.9 | 59   | 58.9 | 58.8 | 58.8 | 58.7 | 56.6 |
| <b>E Mm(S2)</b>    | 58.8 | 59.3 | 58.9 | 59.2 | 58.8 | 58.7 | 58.7 | 58.5 | 56.9 |
| <b>E Mv(SB)</b>    | 59.4 | 60   | 59.4 | 59.6 | 58.8 | 58.8 | 59.2 | 58.5 | 57.5 |
| <b>E Mm(C6)</b>    | 58.8 | 59.4 | 59   | 59.3 | 58.9 | 58.9 | 58.8 | 58.8 | 56.6 |
| <b>E Mvo (A3)</b>  | 58.7 | 61.1 | 58.7 | 60.6 | 58.9 | 58.9 | 58.7 | 58.7 | 58   |
| <b>E Mm(C7)</b>    | 58.9 | 59.3 | 59   | 59.2 | 58.9 | 58.9 | 58.8 | 58.8 | 56.6 |
| <b>E Mvo(PS)</b>   | 59.5 | 61.8 | 60.8 | 61.4 | 58.9 | 58.9 | 58.7 | 58.7 | 58   |
| <b>E Mth(w)</b>    | 58.4 | 59   | 59.2 | 59   | 59.2 | 59.2 | 59.7 | 59.2 | 60.8 |
| <b>E Mth(dH)</b>   | 59.9 | 59.2 | 60.3 | 59.2 | 59.7 | 59.7 | 60.1 | 59.7 | 60.7 |
| <b>E Mtm</b>       | 58.3 | 59   | 59   | 59.2 | 59.5 | 59.5 | 59.1 | 59.5 | 60.8 |
| <b>E MI(Z)</b>     | 59.6 | 61.1 | 58.5 | 60.1 | 59.2 | 58.9 | 59.7 | 58.9 | 58.6 |
| <b>E Ms(ATCC)</b>  | 58.9 | 59.3 | 59.5 | 59.2 | 59.1 | 58.8 | 58.9 | 58.6 | 58.5 |
| <b>E Mk(AV19)</b>  | 59.5 | 59.2 | 60.3 | 59.6 | 61.3 | 60.1 | 60.9 | 61.1 | 58.1 |
| <b>P2 Mj(2661)</b> | 76   | 78.6 | 76.2 | 77.1 | 77.4 | 76.9 | 77.1 | 76.8 | 66.2 |
| <b>P Ma(N-3)</b>   | 81.3 | 83.1 | 80.3 | 82.2 | 87.1 | 88.1 | 87.7 | 87.7 | 66.8 |
| <b>P Mv(SB)</b>    | 81.2 | 83.4 | 81.2 | 82.7 | 92.1 | 93.1 | 93.1 | 92.5 | 65.6 |
| <b>P1 Mj(2661)</b> | 81.6 | 84.6 | 81.5 | 83.7 | 86.2 | 86.1 | 85.6 | 85.5 | 68.1 |
| <b>P1 Mth(dH)</b>  | 100  | 88.8 | 94.6 | 88.5 | 83.4 | 83.6 | 82.1 | 83.7 | 65.4 |
| <b>P2 Mth(dH)</b>  | 88.8 | 100  | 89.2 | 97.7 | 83.4 | 83.6 | 82.1 | 83.7 | 65.4 |
| <b>P1 Mtm</b>      | 94.6 | 89.2 | 100  | 88.8 | 81.7 | 81.5 | 81.4 | 81.1 | 66.7 |
| <b>P2 Mtm</b>      | 88.5 | 97.7 | 88.8 | 100  | 82.1 | 82.1 | 82.6 | 83.1 | 66   |
| <b>P Mm(C7)</b>    | 83.4 | 83.4 | 81.7 | 82.1 | 100  | 98.5 | 97.4 | 98.2 | 66.4 |
| <b>P Mm(C6)</b>    | 83.6 | 83.6 | 81.5 | 82.1 | 98.5 | 100  | 96.8 | 97.9 | 66.4 |
| <b>P Mm(S2)</b>    | 82.1 | 82.1 | 81.4 | 82.6 | 97.4 | 96.8 | 100  | 95.9 | 65.7 |
| <b>P Mm(C5)</b>    | 83.7 | 83.7 | 81.1 | 83.1 | 98.2 | 97.9 | 95.9 | 100  | 65.9 |
| <b>P1 Mk(AV19)</b> | 65.4 | 65.4 | 66.7 | 66   | 66.4 | 66.4 | 65.7 | 65.9 | 100  |
| <b>P2 Mk(AV19)</b> | 66.1 | 66.5 | 66.8 | 66.7 | 65.7 | 65.9 | 65.1 | 65.4 | 67.3 |
| <b>Pd Ma(N-3)</b>  | 55.8 | 55.8 | 55.7 | 56.5 | 58.2 | 58.4 | 58.1 | 57.5 | 55.8 |
| <b>Pd Mj(2661)</b> | 56.3 | 56.3 | 57.1 | 55.1 | 55.9 | 55.6 | 54.1 | 56.5 | 56.4 |
| <b>Pd Mm(C7)</b>   | 55.1 | 55.1 | 55.5 | 54.9 | 56.7 | 57.3 | 56.9 | 57   | 58   |

| <b>PROTEIN</b> | <b>P2 Mk(AV19)</b> | <b>Pd Ma(N-3)</b> | <b>Pd Mj(2661)</b> | <b>Pd Mm(C7)</b> |
|----------------|--------------------|-------------------|--------------------|------------------|
| Geninfo ID     | 20094801           | 150401448         | 15668793           | 150402684        |
| total #aa      | 248                | 342               | 346                | 344              |
| N-term Domain  | 1 - 204            | 1 - 297           | 1 - 301            | 1 - 299          |
| C-term Domain  | 205 - 248          | 297 - 342         | 302 - 346          | 300 - 344        |

#### SEQUENCE SIMILARITIES

|             |      |      |      |      |
|-------------|------|------|------|------|
| E MJ(2661)  | 59.3 | 52.8 | 53.6 | 55.7 |
| E Mtl       | 58.5 | 54.5 | 54.5 | 53.5 |
| E Ma(N-3)   | 58.6 | 55.3 | 53.8 | 56.1 |
| E Mm(C5)    | 58.2 | 53.8 | 55.1 | 53.1 |
| E Mm(S2)    | 58.3 | 52.1 | 52.1 | 53.5 |
| E Mv(SB)    | 58.8 | 53.2 | 53.1 | 53.4 |
| E Mm(C6)    | 58.5 | 52.1 | 53.7 | 53.4 |
| E Mvo (A3)  | 58.6 | 54.8 | 54.1 | 54.8 |
| E Mm(C7)    | 58.8 | 52.1 | 54.7 | 53.4 |
| E Mvo(PS)   | 58.8 | 55.2 | 54.5 | 56.6 |
| E Mth(w)    | 59.6 | 52.8 | 53.5 | 51.6 |
| E Mth(dH)   | 59.4 | 53   | 53.6 | 51.6 |
| E Mtm       | 59.3 | 53.1 | 53.3 | 53.1 |
| E Ml(Z)     | 59.3 | 54.2 | 53.9 | 55.1 |
| E Ms(ATCC)  | 57.9 | 53.9 | 53.9 | 53.3 |
| E Mk(AV19)  | 60.2 | 52.4 | 53.6 | 56   |
| P2 Mj(2661) | 65.6 | 57.1 | 55.3 | 56.7 |
| P Ma(N-3)   | 66.8 | 58.7 | 56.1 | 56.9 |
| P Mv(SB)    | 64.1 | 58.5 | 56.3 | 55.1 |
| P1 Mj(2661) | 67.7 | 57.6 | 55.9 | 57.5 |
| P1 Mth(dH)  | 66.1 | 55.8 | 56.3 | 55.1 |
| P2 Mth(dH)  | 66.5 | 55.8 | 56.3 | 55.1 |
| P1 Mtm      | 66.8 | 55.7 | 57.1 | 55.5 |
| P2 Mtm      | 66.7 | 56.5 | 55.1 | 54.9 |
| P Mm(C7)    | 65.7 | 58.2 | 55.9 | 56.7 |
| P Mm(C6)    | 65.9 | 58.4 | 55.6 | 57.3 |
| P Mm(S2)    | 65.1 | 58.1 | 54.1 | 56.9 |
| P Mm(C5)    | 65.4 | 57.5 | 56.5 | 57   |
| P1 Mk(AV19) | 67.3 | 55.8 | 56.4 | 58   |
| P2 Mk(AV19) | 100  | 53.7 | 56.8 | 52.9 |
| Pd Ma(N-3)  | 53.7 | 100  | 80.9 | 81.3 |
| Pd Mj(2661) | 56.8 | 80.9 | 100  | 81.8 |
| Pd Mm(C7)   | 52.9 | 81.3 | 81.8 | 100  |

**Genes:**

E = H<sub>2</sub>-forming 4(H)MPT dehydrogenase  
P = H<sub>2</sub>-forming 4(H)MPT dehydrogenase paralog  
Pd = Prephenate dehydrogenase

**Organisms:**

MJ(2661) = Methanocaldococcus jannaschii strain 2661  
Mtl = Methanococcus thermolithotrophicus  
Ma (N-3) = Methanococcus aeolicus Nankai-3  
Mm(C5) = Methanococcus maripaludis strain C5  
Mm(S2) = Methanococcus maripaludis strain S2  
Mv(SB) = Methanococcus vanniellii strain SB  
Mm(C6) = Methanococcus maripaludis strain C6  
Mvo (PS) = Methanococcus voltae strain PS  
Mvo (A3) = Methanococcus voltae strain A3  
Mm(C7) = Methanococcus maripaludis strain C7  
Mth(w) = Methanothermobacter thermautotrophicus strain Winter  
Mth(dH) = Methanothermobacter thermautotrophicus strain delta H  
Mtm = Methanothermobacter marburgensis  
MI(Z) = Methanocorpusculum labreanum strain Z  
Ms(ATCC) = Methanobrevibacter smithii ATCC 35061  
Mk(AV19) = Methanopyrus kandleri AV19

**References:**

MJ(2661) = [16]  
Mtl = [17]  
Ma (N-3) = Copeland, A, *et al.*: **Complete sequence of Methanococcus aeolicus Nankai-3. US DOE Joint Genome Institute** (unpublished).  
Mm(C5) = Copeland, A, *et al.*: **Complete sequence of chromosome of Methanococcus maripaludis C5. US DOE Joint Genome Institute** (unpublished).  
Mm(S2) = [18]  
Mv(SB) = Copeland, A, *et al.*: **Complete sequence of Methanococcus vanniellii SB. US DOE Joint Genome Institute** (unpublished).  
Mm(C6) = Copeland, A, *et al.*: **Complete sequence of Methanococcus maripaludis C6. US DOE Joint Genome Institute** (unpublished).  
Mvo (PS) = Hartmann G, Thauer RK: **Hmd genomic sequence. Direct Submission to NCBI databases** 1996.  
Mvo (A3) = Copeland, A, *et al.*: **Sequencing of the draft genome and assembly of Methanococcus voltae A3. US DOE Joint Genome Institute (JGI-PGF)** (unpublished).  
Mm(C7) = Copeland, A, *et al.*: **Complete sequence of Methanococcus maripaludis C7. US DOE Joint Genome Institute** (unpublished).  
Mth(w) = [19]  
Mth(dH) = [20]  
Mtm = [21]  
MI(Z) = Copeland, A, *et al.*: **Complete sequence of Methanocorpusculum labreanum Z. US DOE Joint Genome Institute** (unpublished).  
Ms(ATCC) = [22]  
Mk(AV19) = [23]
