# Supplementary material for: Comprehensive computational analysis of Hmd enzymes and paralogs in methanogenic Archaea
Source: PubMed Central journal article supplement (PMC2739858; doi:10.1186/1471-2148-9-199), 2009-08-11
Supplement: 1471-2148-9-199-S6.pdf [file 1471-2148-9-199-S6.pdf]

|                                         |                 |                                                               |                                                    |
|-----------------------------------------|-----------------|---------------------------------------------------------------|----------------------------------------------------|
| Hmd                                     | E Mm(S2)        | -----MKVAIILGAGCYRTHAAAGITNFSRASQVAKEAGIPEIAMTHSTITMGAE       | 49                                                 |
| Hmd                                     | E Mj(DSM_2661)  | -----MKIAIILGAGCYRTHAAAGITNFSRACEVAKEVVGKPEIALTHSSITYGAE      | 49                                                 |
| Hmd                                     | E Mth(dH)       | -----MIDMKLAILGAGCYRTHAAAGITNFSRACEVAEMVVGKPEIAMTHSTITMGAE    | 52                                                 |
| Hmd                                     | E Mtm           | -----MKLAILGAGCYRTHAAAGITNFSRACEVAEMVVGKPEIAMTHSTITMGAE       | 49                                                 |
| Hmd                                     | E Mk(AV19)      | -----MVEINKVAIILGAGCWRTHAATGITTFKRACEVADEGTIKEAALTHSSVTVYAVE  | 53                                                 |
| Hmd                                     | P Mm(S2)        | -----MKVTVYGAGNQNLYVNLNLPPTYGGVPPYGGSRMAIEFAKAG-----          | 43                                                 |
| Hmd                                     | P1 Mj(DSM_2661) | MRNIRKIKVDNMKVSIVYGAGNQNLYINKLNLPEKFGGEPYGGSRMAIEFAEAG-----   | 54                                                 |
| Hmd                                     | P2 Mj(DSM_2661) | -----MKISIVYGAGNQRLYLEQLKVPEKFGGEPYGGAGMAIEFAKAG-----         | 43                                                 |
| Hmd                                     | P1 Mt(dH)       | -----MKRVIAMKVTVYGAGNQLYTDLNLPERYGGEAPYGGSRMAMEFAMAG-----     | 49                                                 |
| Hmd                                     | P1 Mtm          | -----MITMKVTVYGAGNQLYTELNLPEKYGGEAPYGGSRMAMEFAQAG-----        | 46                                                 |
| Hmd                                     | P2 Mt(dH)       | -----MSTMKVAVYGAGNQLYVDQLNLPEKYGGEAPYGGSRMAIEFAEAG-----       | 46                                                 |
| Hmd                                     | P2 Mtm          | -----MSTMKVAVYGAGNQLYVDQLNLPEKYGGEAPYGGSRMAIEFAEAG-----       | 46                                                 |
| Hmd                                     | P1 Mk(AV19)     | -----MATVAVLGFGNQRLYERIG--AAEKLGGEPFFGGAAMAIEFAEAG-----       | 43                                                 |
| Hmd                                     | P2 Mk(AV19)     | -----MEVHYELPLGGAHLAYRAAEAG-----                              | 22                                                 |
|                                         |                 |                                                               |                                                    |
| Hmd                                     | E Mm(S2)        | LLHLIPEITEVVVSDPCFAEPPGMVVLID-----QFDYKAVMEAHLAGDAEKVMPEIREAV | 104                                                |
| Hmd                                     | E Mj(DSM_2661)  | LLHLVPDVKEVIVSDPCFAEPPGLVVID-----EFDPKVEVMEAHLSGNPESIMPKIREVV | 104                                                |
| Hmd                                     | E Mth(dH)       | LKELAG-VDEVVADVPVFDN--QFTVID-----DFAYEDVIEAHKE-DPEKIMPQIREKV  | 103                                                |
| Hmd                                     | E Mtm           | LKELAG-VDEVVADVPVFDN--QFTVID-----DFAYEDVIEAHKE-DPENIMPQIREKV  | 100                                                |
| Hmd                                     | E Mk(AV19)      | LKHLAG-VDEVVSDPVFDAD-GFTVVVDIEEDCDVDLDEFIKAHLEGNPEDVMPKLRDyv  | 111                                                |
| Hmd                                     | P Mm(S2)        | -----HDVILAEP-----                                            | 51                                                 |
| Hmd                                     | P1 Mj(DSM_2661) | -----HDVVLAEP-----                                            | 62                                                 |
| Hmd                                     | P2 Mj(DSM_2661) | -----HDVVLSEP-----                                            | 51                                                 |
| Hmd                                     | P1 Mt(dH)       | -----HDVILAEP-----                                            | 57                                                 |
| Hmd                                     | P1 Mtm          | -----HEVTLAEP-----                                            | 54                                                 |
| Hmd                                     | P2 Mt(dH)       | -----HDVVLAEP-----                                            | 54                                                 |
| Hmd                                     | P2 Mtm          | -----HDVVLAEP-----                                            | 54                                                 |
| Hmd                                     | P1 Mk(AV19)     | -----HDVVLAEP-----                                            | 51                                                 |
| Hmd                                     | P2 Mk(AV19)     | -----HDVVLCDP-----                                            | 30                                                 |
|                                         |                 |                                                               |                                                    |
| Hmd                                     | E Mm(S2)        | KAKAKETPKPPKGCIFVHPETVG----LKVTDASDVEAVKDADIVITWLPKGGSQPAIIE  | 160                                                |
| Hmd                                     | E Mj(DSM_2661)  | KAKAKELPKPPKACIHLVHPEDVG----LKVTSDDREAVEGADIVITWLPKGNKQPDIIK  | 160                                                |
| Hmd                                     | E Mth(dH)       | NEVAKELPKPPEGAIHPTHPEDLG----FEITDDREAVADADFIMTWFPKGDMPQPIID   | 159                                                |
| Hmd                                     | E Mtm           | NEVAKELPKPPEGAIHPTHPEDLG----FEITDDREAVADADFIMTWFPKGDMPQPIIN   | 156                                                |
| Hmd                                     | E Mk(AV19)      | NDIADDVPPKPPKGAIFLSPEEMEDKLDIVVTTDDAEAVEDADMIISWLPKGGVQPDIFK  | 171                                                |
| Hmd                                     | P Mm(S2)        | -----NKSNTLDEQWKIVVEEAG----VKVLTDDAEAAKEAEIAIFFTPPFGKKTVEIAK  | 00                                                 |
| Hmd                                     | P1 Mj(DSM_2661) | -----NKNIMSDDLWKKVEDAG----VKVVSDDVEAAKHGEIHVLFPPFGKATFRIAK    | 111                                                |
| Hmd                                     | P2 Mj(DSM_2661) | -----NRDVMSSDDLWKKVEDAG----VKVVSDDIEAAKHGEIHVLFPPFRITLNIAN    | 100                                                |
| Hmd                                     | P1 Mt(dH)       | -----SREFLDDEQWSMVEEAG----VTVTDNDKEAASEAEVAVLFTPPFGKGTFSIAR   | 106                                                |
| Hmd                                     | P1 Mtm          | -----VRDVLDDGHWNLVEEAG----VTVTDNDKEASAEADVAVLFTPPFGKGTVRIAR   | 103                                                |
| Hmd                                     | P2 Mt(dH)       | -----ARDMLDDAHWKVVEDAG----VTVTDNDAEAAASEAEIAVLFPPFGKKTPEIAK   | 103                                                |
| Hmd                                     | P2 Mtm          | -----AREMLDDAHWKVVEDAG----VTVTDSDAEAAASEAEMAVLFTPPFGKKTFDIAK  | 103                                                |
| Hmd                                     | P1 Mk(AV19)     | -----NLSEQDPEHVDRVADAG----VELTEDDAQAVEGAEMVVLFTPPFG-ATGGIIR   | 99                                                 |
| Hmd                                     | P2 Mk(AV19)     | -----SFDISE-ESMERLESAG----VELVTDTAGVEHGEIQILFTPPFG-HTVKIAR    | 77                                                 |
|                                         |                 |                                                               |                                                    |
| Hmd                                     | E Mm(S2)        | KFASEIKKGAIVTHACTIPTPKFAKIFKDLG-----RDDLNIIAYHPGAVPEMKGQAFI   | 214                                                |
| Hmd                                     | E Mj(DSM_2661)  | KFADAIPEGAIVTHACTIPTTKFAKIFKDLG-----REDLNITSYHPGCVPEMKGQVYI   | 214                                                |
| Hmd                                     | E Mth(dH)       | KFIDDIKPGAIVTHACTIPTTKFYKIFEKKGDLVTKPETLNVTSYHPGAVPEMKGQVYI   | 219                                                |
| Hmd                                     | E Mtm           | KFIDDIKPGAIVTHACTIPTTKFYKIFEQKHGDLVTKPETLNVTSYHPGAVPEMKGQVYI  | 216                                                |
| Hmd                                     | E Mk(AV19)      | KIIDDIPGECIVANTCTIPTRQFKEMFEDMG-----RDDLQVTSYHPATVPEHKGQVYV   | 225                                                |
| Hmd                                     | P Mm(S2)        | TILPHLPQNAIIANTCTVSPVILYTMLEVELR---TKRKDIGITSMHPAAVPGTPOHGHI  | 157                                                |
| Hmd                                     | P1 Mj(DSM_2661) | TIIEHPVENAIIANTCTVSPVLYYSLEPILR---TKRKDVGISSMHPAAVPGTPOHGHI   | 168                                                |
| Hmd                                     | P2 Mj(DSM_2661) | TIIEHPVENAIIANTCTIPTVLYRSLEGILR---LKRKDVGISSMHPAAVPGTPOHGHI   | 157                                                |
| Hmd                                     | P1 Mt(dH)       | EILPELPEGSVIANCTVSPVLYYVLEKELK---LERTDVGVSMMHPAAVPGTPOHGHI    | 163                                                |
| Hmd                                     | P1 Mtm          | EILPELPEGAVIANCTVSPVLYYVLEKELK---MDRTDIGVSSMHPAAVPGTPOHGHI    | 160                                                |
| Hmd                                     | P2 Mt(dH)       | NITNHLPEGAVIANCTVSPVLYYVLERELR---RDRKDLGIASMMHPAAVPGTPOHGHI   | 160                                                |
| Hmd                                     | P2 Mtm          | DITKHLPEGAVIANCTVSPVLYYVLERELR---RDRQDLGIASMMHPAAVPGTPOHGHI   | 160                                                |
| Hmd                                     | P1 Mk(AV19)     | EIASHLEEGAVVCTCTSSAFEIHESLYEAGL---EVPEAVGVMPAHPAGIPGTENHRAI   | 156                                                |
| Hmd                                     | P2 Mk(AV19)     | ELLDDVREGAVLCTCTCPPIALYHGLEGELR---TKREDVGVSSFPAGIPGAETQDLI    | 134                                                |
|                                         |                 |                                                               |                                                    |
| Hmd                                     | E Mm(S2)        | SEG-----LADAEKVEEFCMAKTARGEAFKMPANLISPVCMDGSAVTAPVYAAI        | 264                                                |
| Hmd                                     | E Mj(DSM_2661)  | AEG-----YASEEAVNKLYEIGKIARGKAFKMPANLIGPVCMDCSAVTATVYAGL       | 264                                                |
| Hmd                                     | E Mth(dH)       | AEG-----YASEEAINTLFELGQKARGNAYRLPAELLGVPVCMDCSALTATYAGI       | 269                                                |
| Hmd                                     | E Mtm           | AEG-----YASEDAIETLFELGQKARGNAYRLPAELLGVPVCMDCSALTAMTYACI      | 266                                                |
| Hmd                                     | E Mk(AV19)      | AEG-----YADEEVVEAVYELGEKARGLAFKVPGYLLGVPVCMDASAVTAIVYAGL      | 275                                                |
| Hmd                                     | P Mm(S2)        | VISSKAT--NGTEYASDEQIEKCVKLTESIETKPYLVPADVSATVSDMGSLTAVTLAGV   | 215                                                |
| Hmd                                     | P1 Mj(DSM_2661) | VIGGKTT--DGKELATEEQIKKAVELAKSAGKEAYVVPADVSSVVDMDGSLVTAVALSGV  | 226                                                |
| Hmd                                     | P2 Mj(DSM_2661) | TIAGKAL--EGKEYATEDQINKLVELVKSVMGKIPYVTPADVVPVAVADMALVTAVALGV  | 215                                                |
| Hmd                                     | P1 Mt(dH)       | VIGGRPT--AELDMATDEQVSRCAELAESTGKKAYIVPADVTSAVADMGSLVTAVALAGV  | 221                                                |
| Hmd                                     | P1 Mtm          | VIGGRPT--AELDIATDEQIARCAELAESTGKTAYVVPADVTSAVADMGSLVTAVALAGV  | 218                                                |
| Hmd                                     | P2 Mt(dH)       | VIGGHSS--SELDIATDEQISRCVELAESCGKVAYVVPADVSSAVADMGSLVTAVALSGV  | 218                                                |
| Hmd                                     | P2 Mtm          | VIGGHSS--SELDIATDEQISRCVELAESCGKTAYVVPADVSSAVADMGSLVTAVALSGV  | 218                                                |
| Hmd                                     | P1 Mk(AV19)     | ITARGETG--NGTVLATEEQAEVVEVLSSTGKEVFPVLPVPELVSVVGDLSVLLKRVIEA  | 214                                                |
| Hmd                                     | P2 Mk(AV19)     | LVADARSEESGIELASEEQVERCVNLAEDMGYDVYVL--DPELISSIGDMSVVLTVRIVQA | 193                                                |
|                                         |                 |                                                               |                                                    |
| N-terminal domain ← → C-terminal domain |                 |                                                               |                                                    |
| Hmd                                     | E Mm(S2)        | LAYRDAVTQILGAPADFAQMMADEAISQILDLMRNEGKIKNMEKLNPKALTGTADSMCFG  | 324                                                |
| Hmd                                     | E Mj(DSM_2661)  | LAYRDAVTKILGAPADFAQMMADEALTOIHNLMKEKGIANMEEALDPAALLGTADSMCFG  | 324                                                |
| Hmd                                     | E Mth(dH)       | LSYRDSVTQVLGAPAGFAQMMAKESLEQITALEKVGIDKMEEHLDPGALLGTADSMNFG   | 329                                                |
| Hmd                                     | E Mtm           | LSYRDSVTQVLGAPASFAQMMAKESLEQITALEKVGIDKMEENLDPGALLGTADSMNFG   | 326                                                |
| Hmd                                     | E Mk(AV19)      | LTPRDACTDILGAPVDFTQNMAVEALQMAKFMEEEGLDKLEALDPAALTNTADSMNFG    | 335                                                |
| Hmd                                     | P Mm(S2)        | LDYYSVGTQVIKAPKMKVEQQILMTLQTMASLVESGVDGLVKALNPELLSKAASSMHLL   | 275                                                |
| Hmd                                     | P1 Mj(DSM_2661) | LDYITVGRKIINAPKMKIEQQVIMTLQTMASLVETSIGIEGMVKALNPELLIRSASSMKLL | 286                                                |
| Hmd                                     | P2 Mj(DSM_2661) | LDYIRVGTQIINAPKDMIEKQILISLQTIASIIETSGMEGLMKVFNKDALSSAKNMLID   | 275                                                |
| Hmd                                     | P1 Mt(dH)       | LDYIYVGTQIIKAPKEMVEKQILMTLQTMASLVETSIGVDGMAAAINPELLVKSARSMHLL | 281                                                |
| Hmd                                     | P1 Mtm          | LDYIYVGTQIIKAPKEMVEKQILMTLQTMASLVETSIGVDGMARAMNPELLVKSARSMHLL | 278                                                |
| Hmd                                     | P2 Mt(dH)       | LDYIYVGTQIIKAPKEMVEKQILMTLQTIASLVETSIGVNGMLKAMNPELLVRSARSMHLL | 278                                                |
| Hmd                                     | P2 Mtm          | LDYIYVGTQIIKAPVEMVEKQILMTLQTIASLVETSIGVNGMLKAMNPELLVRSARSMHLL | 278                                                |
| Hmd                                     | P1 Mk(AV19)     | LKEFCVAVKALG-APQEMIDRQAMMTLATLAALIEAGGIGG-----LLETLDDEEAIE    | 264                                                |
| Hmd                                     | P2 Mk(AV19)     | ICNYFSVARICGAPIEMIEEQVEEVLSTMAYLVGRYGLDAPDRMD-GKLLRLSLRNMLT   | 252                                                |
|                                         |                 |                                                               |                                                    |
| Hmd                                     | E Mm(S2)        | -----PLAD--ILPASLVLEKH-ANENKCECGCSIKP                         | 354                                                |
| Hmd                                     | E Mj(DSM_2661)  | -----PLAE--ILPTALKVLEKHKVVEEKGKTKCEIMS                        | 355                                                |
| Hmd                                     | E Mth(dH)       | -----ASAD--ILPTVFEILEKRKK-----                                | 347                                                |
| Hmd                                     | E Mtm           | -----ASAE--ILPTVFEILEKRKK-----                                | 344                                                |
| Hmd                                     | E Mk(AV19)      | -----PLADTEILPKALEVLEKYSKKA-----                              | 358                                                |
| Hmd                                     | P Mm(S2)        | DQKDLDAALEILTHLDGELEKASTVAEIKPTTLVAAQSLVKELETIGGAAANGAIKRS    | 335                                                |
| Hmd                                     | P1 Mj(DSM_2661) | DRQKDLDAALEILQNLDETLEKAEVEKAEIKPTTLVAAQSLVKEIKTLIGGAAANGAIKRS | 346                                                |
| Hmd                                     | P2 Mj(DSM_2661) | ERQEDLNALAKIIEEFDKST---IGEKDISQTYLVAPQALIKEAVSLIGKSAVEGMIRRS  | 332                                                |
| Hmd                                     | P1 Mt(dH)       | DEQEELDAALKKISDLNDDVMKWIEGAEVNHTDLVAAQALTGELKTVIGDRAAEGTIRRC  | 341                                                |
| Hmd                                     | P1 Mtm          | DEQEELDAALRKISQLNDDVMKWIEGAEVKHTDLVAAQALTGELKTVMGDRAAEGTIRRC  | 338                                                |
| Hmd                                     | P2 Mt(dH)       | EEQEELDAALNTLSDLNDDVMKWIEKGEIRHTDLVAAQALAKEIKNLMGGKAAEGTIRRC  | 338                                                |
| Hmd                                     | P2 Mtm          | EEQEELDAALNTLADLDDEVTQWINKGEIRHTDLVAAQALAKELKNLMGGKAAEGTIRRC  | 338                                                |
| Hmd                                     | P1 Mk(AV19)     | ASYSNMEPFVVDG-----VEEPEGEPVERFVVLPGREATREAVIELVGERGWRTVMRA    | 316                                                |
| Hmd                                     | P2 Mk(AV19)     | EDVERVVDFFERC--YVDLLSGDRESMRELSMMVPPDKLVDRVREIVGEAPVQYARRRF   | 310                                                |
|                                         |                 |                                                               |                                                    |
| Hmd                                     | E Mm(S2)        | -----                                                         | = top 10 MFS scoring residue in best RAPDF model   |
| Hmd                                     | E Mj(DSM_2661)  | QKE----- 358                                                  | = top 10 MFS scoring residue in best C-score model |
| Hmd                                     | E Mth(dH)       | -----                                                         | = top 10 MFS scoring residue in both models        |
| Hmd                                     | E Mtm           | -----                                                         |                                                    |
| Hmd                                     | E Mk(AV19)      | -----                                                         |                                                    |
| Hmd                                     | P Mm(S2)        | TKKLFQ-- 341                                                  |                                                    |
| Hmd                                     | P1 Mj(DSM_2661) | ARKLFEH-- 353                                                 |                                                    |
| Hmd                                     | P2 Mj(DSM_2661) | SNKLFK-- 338                                                  |                                                    |
| Hmd                                     | P1 Mt(dH)       | MRKMFEE-- 347                                                 |                                                    |
| Hmd                                     | P1 Mtm          | MRKMFEE-- 344                                                 |                                                    |
| Hmd                                     | P2 Mt(dH)       | MRKMFEE-- 344                                                 |                                                    |
| Hmd                                     | P2 Mtm          | MRKMFEE-- 344                                                 |                                                    |
| Hmd                                     | P1 Mk(AV19)     | WVDLYKHH 324                                                  |                                                    |
| Hmd                                     | P2 Mk(AV19)     | FEERRWGS 318                                                  |                                                    |
